# Supplementary material
Source: PubMed Central journal article supplement (PMC3872269)
Supplement: NIHMS516784-supplement-01.pdf [file NIHMS516784-supplement-01.pdf]

**Figure S1.**

4 hr pulse

Lineage  
↑  
BrdU  
→

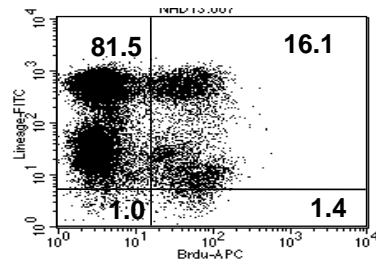

| Cell fraction    | Proliferation rate |
|------------------|--------------------|
| Lineage Positive | <b>16.5%</b>       |
| Lineage Negative | <b>58.3%</b>       |

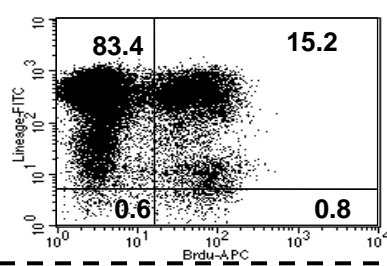

| Cell fraction    | Proliferation rate |
|------------------|--------------------|
| Lineage Positive | <b>15.4%</b>       |
| Lineage Negative | <b>57.1%</b>       |

16 hr pulse

Lineage  
↑  
BrdU  
→

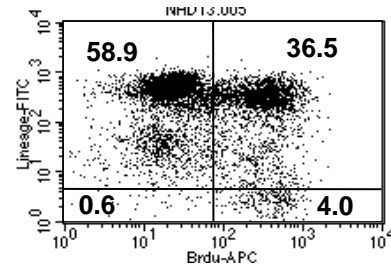

| Cell fraction    | Proliferation rate |
|------------------|--------------------|
| Lineage Positive | <b>38.3%</b>       |
| Lineage Negative | <b>87.0%</b>       |

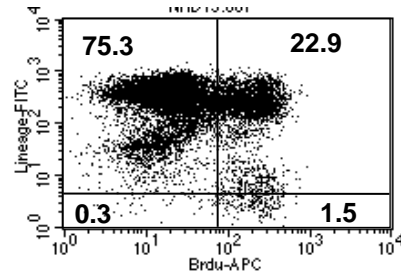

| Cell fraction    | Proliferation rate |
|------------------|--------------------|
| Lineage Positive | <b>23.3%</b>       |
| Lineage Negative | <b>83.3%</b>       |
