# Supplementary material
Source: PubMed Central journal article supplement (PMC3872269)
Supplement: NIHMS516784-supplement-07.pdf [file NIHMS516784-supplement-07.pdf]

**Supplementary Table S1. Analysis of point mutation in *cII* genes of rescued  $\lambda$  phages**

| Mutation | WT | % freq. | NHD13 | % freq. |
|----------|----|---------|-------|---------|
| AT : GC  | 5  | 8.3     | 13    | 21.7    |
| AT : TA  | 4  | 6.7     | 3     | 5.0     |
| CG : AT  | 14 | 23.3    | 8     | 13.3    |
| CG : GC  | 6  | 10.0    | 4     | 6.7     |
| CG : TA  | 28 | 46.7    | 30    | 50.0    |
| TA : GC  | 3  | 5.0     | 2     | 3.3     |
| Total    | 60 | 100.0   | 60    | 100.0   |

freq, frequency
