# Supplementary material
Source: PubMed Central journal article supplement (PMC3872269)
Supplement: NIHMS516784-supplement-08.pdf [file NIHMS516784-supplement-08.pdf]

**Supplementary Table S2. Type of mutation in *cII* genes from rescued  $\lambda$  phages**

| Mut Type    | WT      |            | NHD13   |              |
|-------------|---------|------------|---------|--------------|
|             | No. Mut | % freq.    | No. Mut | % freq.      |
| Point       | 60      | 92.3       | 60      | 75.0         |
| Frame shift | 5       | <b>7.7</b> | 20      | <b>25.0*</b> |
| (insertion) | (5)     | (7.7)      | (18)    | (22.5)       |
| (deletion)  |         | (0.0)      | (2)     | (2.5)        |
| Total       | 65      | 100        | 80      | 100          |

Mut, mutation; freq, frequency; \*, $p=0.007$
