# Supplementary material
Source: PubMed Central journal article supplement (PMC3872269)

Figure S2.

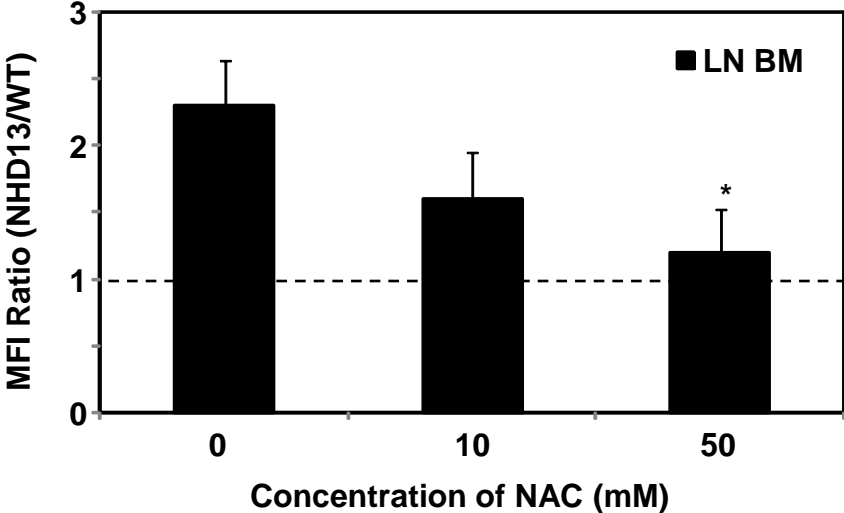

Supplement: NIHMS516784-supplement-02.pdf [file NIHMS516784-supplement-02.pdf]

**Figure S3**

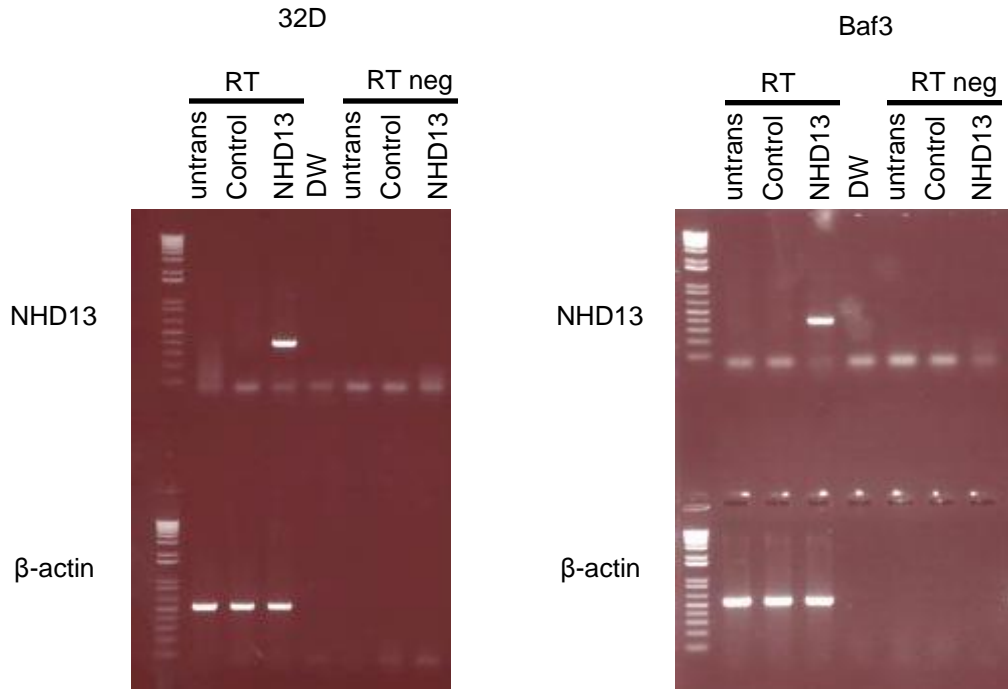

Supplement: NIHMS516784-supplement-03.pdf [file NIHMS516784-supplement-03.pdf]

Figure S4.

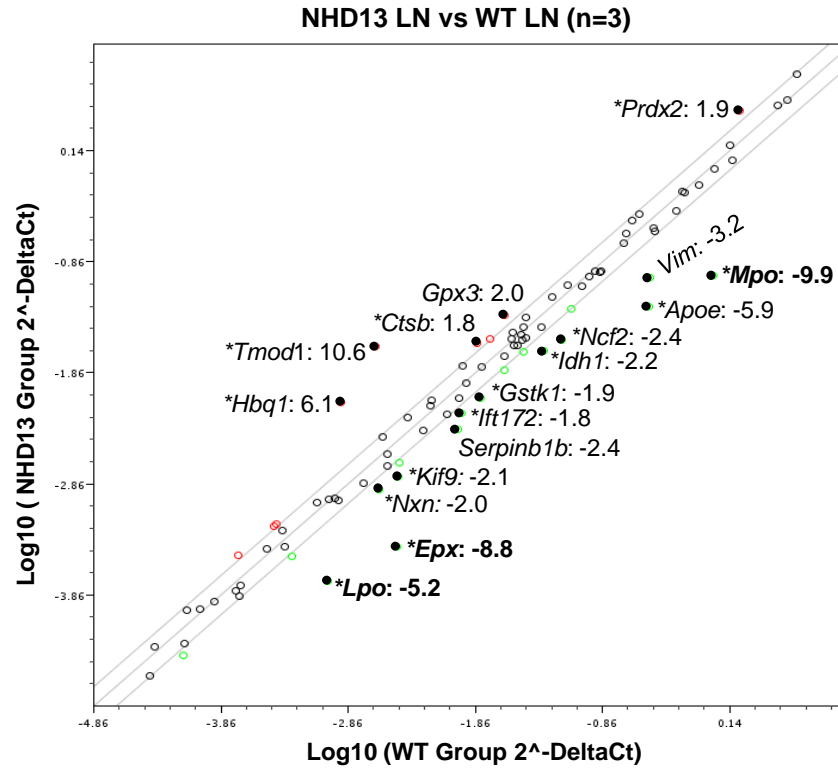

Supplement: NIHMS516784-supplement-04.pdf [file NIHMS516784-supplement-04.pdf]

Figure S5.

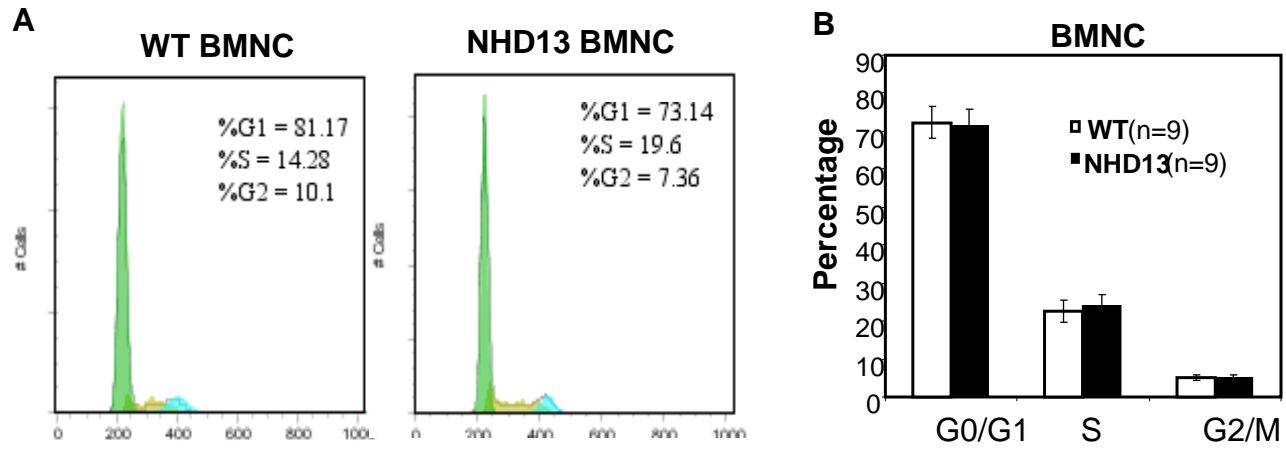

Supplement: NIHMS516784-supplement-05.pdf [file NIHMS516784-supplement-05.pdf]

Figure S6.

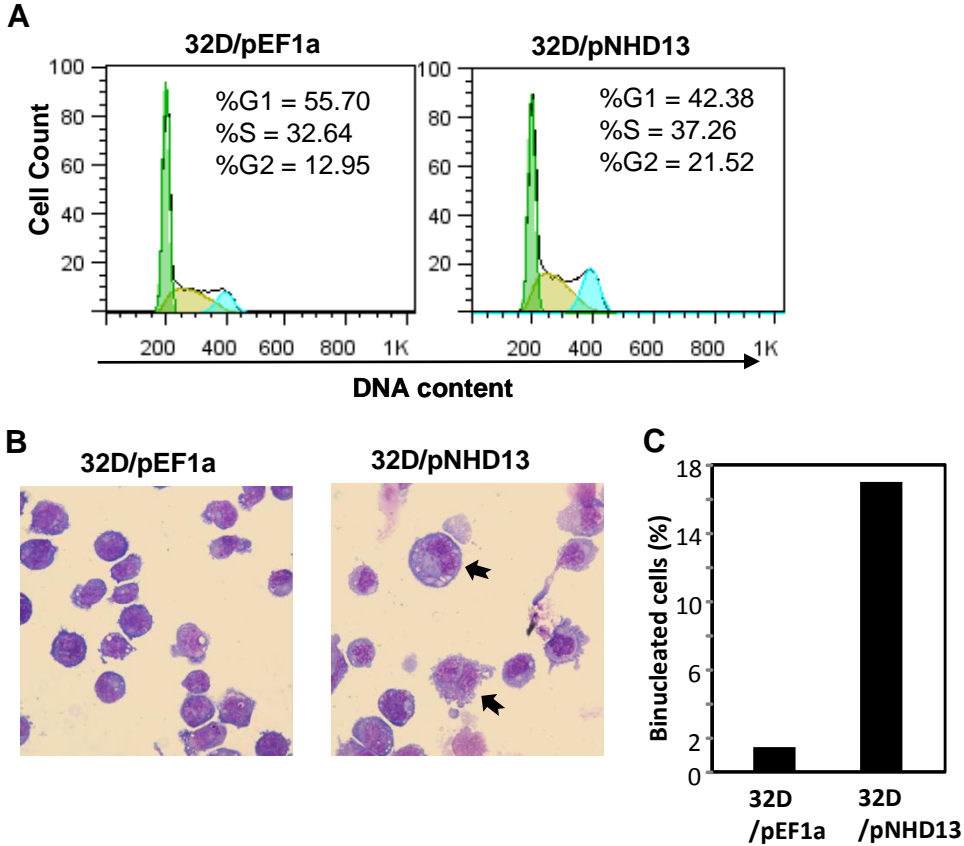

Supplement: NIHMS516784-supplement-06.pdf [file NIHMS516784-supplement-06.pdf]
